# Supplementary material
Source: PubMed Central journal article supplement (PMC7145739)
Supplement: NIHMS1553411-supplement-Supplemental_table_1.pdf [file NIHMS1553411-supplement-Supplemental_table_1.pdf]

**Supplementary Table 1.** Proximal femur vBMD (mg/cm<sup>3</sup>) in controls, jumpers and pitchers

|                     | Controls                   |                       |                                  | Jumpers                    |                       |                                  | Pitchers                   |                       |                                  |
|---------------------|----------------------------|-----------------------|----------------------------------|----------------------------|-----------------------|----------------------------------|----------------------------|-----------------------|----------------------------------|
|                     | Nondominant <sup>a,b</sup> | Dominant <sup>a</sup> | Abs. diff. (95% CI) <sup>c</sup> | Nondominant <sup>a,b</sup> | Dominant <sup>a</sup> | Abs. diff. (95% CI) <sup>c</sup> | Nondominant <sup>a,b</sup> | Dominant <sup>a</sup> | Abs. diff. (95% CI) <sup>c</sup> |
| <b>Total</b>        |                            |                       |                                  |                            |                       |                                  |                            |                       |                                  |
| Integral vBMD       | 349 ± 45 <sup>J</sup>      | 353 ± 46              | 4 (-1, 8)                        | 384 ± 39 <sup>C</sup>      | 392 ± 41              | 8 (1, 15)*                       | 358 ± 30                   | 378 ± 30              | 20 (14, 26)†                     |
| Cortical vBMD       | 569 ± 40                   | 573 ± 42              | 4 (-1, 9)                        | 591 ± 30                   | 601 ± 32              | 10 (2, 17)*                      | 576 ± 37                   | 593 ± 35              | 17 (11, 24)†                     |
| Trabecular vBMD     | 192 ± 35 <sup>J</sup>      | 193 ± 35              | 1 (-3, 6)                        | 211 ± 30 <sup>C</sup>      | 212 ± 27              | 1 (-3, 5)                        | 195 ± 21                   | 206 ± 23              | 11 (4, 18)†                      |
| <b>Femoral neck</b> |                            |                       |                                  |                            |                       |                                  |                            |                       |                                  |
| Integral vBMD       | 383 ± 45                   | 385 ± 45              | 1 (-5, 8)                        | 409 ± 41                   | 425 ± 46              | 15 (3, 27)*                      | 394 ± 33                   | 412 ± 33              | 18 (11, 26)†                     |
| Cortical vBMD       | 567 ± 39                   | 571 ± 44              | 4 (-7, 15)                       | 587 ± 42                   | 606 ± 46              | 19 (6, 31)†                      | 586 ± 34                   | 607 ± 38              | 21 (10, 32)†                     |
| Trabecular vBMD     | 209 ± 38 <sup>J</sup>      | 208 ± 41              | -2 (-8, 5)                       | 230 ± 36 <sup>C</sup>      | 231 ± 33              | 1 (-7, 8)                        | 215 ± 21                   | 221 ± 24              | 7 (-3, 16)                       |
| <b>Trochanter</b>   |                            |                       |                                  |                            |                       |                                  |                            |                       |                                  |
| Integral vBMD       | 347 ± 48 <sup>J</sup>      | 351 ± 49              | 4 (-1, 9)                        | 387 ± 43 <sup>C</sup>      | 393 ± 43              | 6 (-2, 14)                       | 356 ± 33                   | 376 ± 33              | 20 (13, 27)†                     |
| Cortical vBMD       | 583 ± 46                   | 587 ± 48              | 4 (-1, 9)                        | 611 ± 32                   | 620 ± 34              | 9 (1, 17)*                       | 592 ± 44                   | 608 ± 39              | 16 (8, 24)†                      |
| Trabecular vBMD     | 190 ± 36                   | 192 ± 36              | 2 (-2, 6)                        | 208 ± 30                   | 210 ± 28              | 1 (-3, 6)                        | 192 ± 23                   | 204 ± 24              | 11 (4, 19)†                      |

<sup>a</sup> Data are mean ± SD, corrected for whole-body lean body mass

<sup>b</sup> Differences in nondominant leg properties between groups were assessed using a one-way ANOVA followed by a Fisher's least square difference post-hoc test, with whole-body lean mass as a covariate. Capital letters indicate the non-dominant leg data differs significantly from controls (C), jumpers (J), and pitchers (P) (p<0.05).

<sup>c</sup> Mean absolute differences between dominant and nondominant legs were assessed using single sample *t*-tests with a population mean of 0. Significance is indicated by: †p<0.05.
