# Supplementary material
Source: PubMed Central journal article supplement (PMC7145739)
Supplement: NIHMS1553411-supplement-Supplemental_table_2.pdf [file NIHMS1553411-supplement-Supplemental_table_2.pdf]

**Supplementary Table 2.** Finite element computed proximal femur strength (N) in controls, jumpers and pitchers

|                                                        | Controls                   |                       |                                     | Jumpers                    |                       |                                     | Pitchers                   |                       |                                     |
|--------------------------------------------------------|----------------------------|-----------------------|-------------------------------------|----------------------------|-----------------------|-------------------------------------|----------------------------|-----------------------|-------------------------------------|
|                                                        | Nondominant <sup>a,b</sup> | Dominant <sup>a</sup> | Abs. diff.<br>(95% CI) <sup>c</sup> | Nondominant <sup>a,b</sup> | Dominant <sup>a</sup> | Abs. diff.<br>(95% CI) <sup>c</sup> | Nondominant <sup>a,b</sup> | Dominant <sup>a</sup> | Abs. diff.<br>(95% CI) <sup>c</sup> |
| <b>Single-leg stance</b>                               |                            |                       |                                     |                            |                       |                                     |                            |                       |                                     |
| Ultimate strength                                      | 19722 ± 2766 <sup>J</sup>  | 19529 ± 3037          | -193 (-966, 581)                    | 25498 ± 4789 <sup>CP</sup> | 26282 ± 4694          | 784 (-165, 1734)                    | 19473 ± 1987 <sup>J</sup>  | 20329 ± 2248          | 856 (287, 1425) <sup>†</sup>        |
| <b>Fall onto the posterolateral greater trochanter</b> |                            |                       |                                     |                            |                       |                                     |                            |                       |                                     |
| Yield strength                                         | 3058 ± 698 <sup>J</sup>    | 2931 ± 689            | -127 (-355, 100)                    | 4362 ± 851 <sup>CP</sup>   | 4519 ± 791            | 157 (-171, 485)                     | 2847 ± 721 <sup>J</sup>    | 3190 ± 863            | 343 (11, 675) <sup>†</sup>          |
| Ultimate strength                                      | 4890 ± 763                 | 4871 ± 533            | -19 (-352, 314)                     | 5369 ± 966                 | 5496 ± 689            | 127 (-154, 408)                     | 4968 ± 759                 | 5000 ± 765            | 32 (-213, 277)                      |

<sup>a</sup> Data are mean ± SD, corrected for whole-body lean body mass

<sup>b</sup> Differences in nondominant leg properties between groups were assessed using a one-way ANOVA followed by a Fisher's least square difference post-hoc test, with whole-body lean mass as a covariate. Capital letters indicate the non-dominant leg data differs significantly from controls (C), jumpers (J), and pitchers (P) (p<0.05).

<sup>c</sup> Mean absolute differences between dominant and nondominant legs were assessed using single sample *t*-tests with a population mean of 0. Significance is indicated by: †p<0.05.
